# Supplementary material for: Comparative Study of Physicochemical Properties and Starch Granule Structure in Seven Ginkgo Kernel Flours
Source: MDPI journal article supplement (doi:10.3390/foods10081721), 2021-07-26
Supplement: s1 [file s1]

### Supplementary Figure

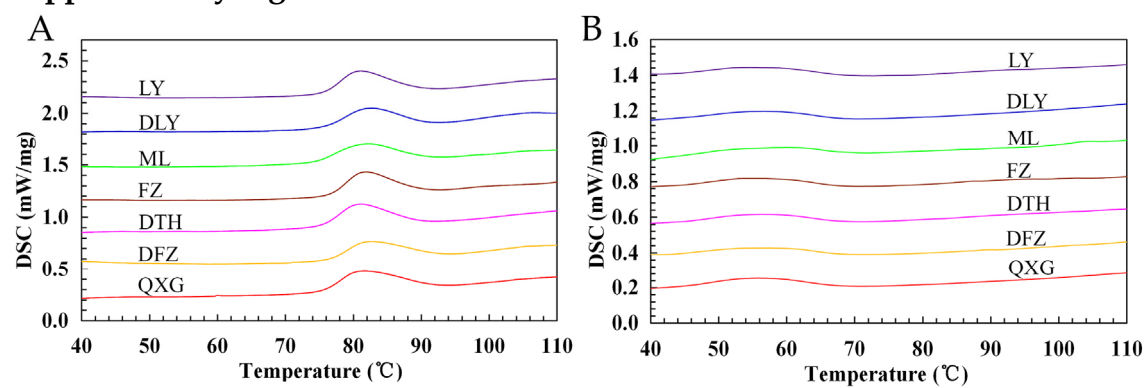

**Figure S1.** Gelatinisation (A) and retrogradation (B) of kernel flours from seven ginkgo cultivars as determined by DSC.

## Supplementary Tables

**Table S1.** Amino acid contents of kernels from seven ginkgo cultivars

| Items               | Ginkgo cultivars        |                         |                        |                        |                         |                        |                         |
|---------------------|-------------------------|-------------------------|------------------------|------------------------|-------------------------|------------------------|-------------------------|
|                     | QXG                     | DFZ                     | DTH                    | FZ                     | ML                      | DLY                    | LY                      |
| Aspartic acid (Asp) | 0.74±0.01 <sup>b</sup>  | 0.81±0.32 <sup>a</sup>  | 0.92±0.13 <sup>a</sup> | 0.71±0.10 <sup>b</sup> | 0.81±0.05 <sup>a</sup>  | 0.94±0.04 <sup>a</sup> | 0.72±0.06 <sup>b</sup>  |
| Threonine (Thr)     | 0.41±0.00 <sup>a</sup>  | 0.41±0.18 <sup>a</sup>  | 0.45±0.06 <sup>a</sup> | 0.37±0.03 <sup>b</sup> | 0.40±0.00 <sup>a</sup>  | 0.50±0.01 <sup>a</sup> | 0.39±0.02 <sup>b</sup>  |
| Serine (Ser)        | 0.49±0.00 <sup>b</sup>  | 0.45±0.19 <sup>b</sup>  | 0.54±0.07 <sup>a</sup> | 0.42±0.00 <sup>a</sup> | 0.47±0.00 <sup>b</sup>  | 0.61±0.01 <sup>a</sup> | 0.48±0.02 <sup>b</sup>  |
| Glutamic acid (Glu) | 1.31±0.01 <sup>b</sup>  | 1.39±0.56 <sup>b</sup>  | 1.56±0.16 <sup>a</sup> | 1.27±0.07 <sup>b</sup> | 1.34±0.01 <sup>b</sup>  | 1.72±0.07 <sup>a</sup> | 1.31±0.06 <sup>b</sup>  |
| Glycin (Gly)        | 0.40±0.01 <sup>ab</sup> | 0.41±0.17 <sup>ab</sup> | 0.47±0.05 <sup>a</sup> | 0.36±0.03 <sup>b</sup> | 0.40±0.01 <sup>ab</sup> | 0.48±0.03 <sup>a</sup> | 0.39±0.03 <sup>ab</sup> |
| Alanine (Ala)       | 0.51±0.01 <sup>b</sup>  | 0.57±0.25 <sup>a</sup>  | 0.63±0.08 <sup>a</sup> | 0.48±0.04 <sup>b</sup> | 0.54±0.02 <sup>b</sup>  | 0.66±0.05 <sup>a</sup> | 0.52±0.05 <sup>b</sup>  |
| Valine (Val)        | 0.47±0.07 <sup>a</sup>  | 0.53±0.20 <sup>a</sup>  | 0.54±0.06 <sup>a</sup> | 0.42±0.03 <sup>b</sup> | 0.46±0.04 <sup>a</sup>  | 0.54±0.06 <sup>a</sup> | 0.45±0.05 <sup>ab</sup> |
| Isoleucine (Ile)    | 0.36±0.04 <sup>a</sup>  | 0.43±0.19 <sup>a</sup>  | 0.44±0.08 <sup>a</sup> | 0.33±0.02 <sup>a</sup> | 0.39±0.03 <sup>a</sup>  | 0.47±0.06 <sup>a</sup> | 0.38±0.06 <sup>a</sup>  |
| Leucine (Leu)       | 0.56±0.03 <sup>ab</sup> | 0.62±0.25 <sup>a</sup>  | 0.69±0.08 <sup>a</sup> | 0.54±0.04 <sup>b</sup> | 0.60±0.03 <sup>a</sup>  | 0.71±0.05 <sup>a</sup> | 0.58±0.05 <sup>a</sup>  |
| Tyrosine (Tyr)      | 0.20±0.01 <sup>a</sup>  | 0.21±0.10 <sup>a</sup>  | 0.23±0.03 <sup>a</sup> | 0.18±0.02 <sup>a</sup> | 0.20±0.00 <sup>a</sup>  | 0.25±0.00 <sup>a</sup> | 0.20±0.02 <sup>a</sup>  |
| Phenylalanine (Phe) | 0.35±0.00 <sup>a</sup>  | 0.36±0.17 <sup>a</sup>  | 0.42±0.06 <sup>a</sup> | 0.36±0.02 <sup>a</sup> | 0.36±0.00 <sup>a</sup>  | 0.42±0.00 <sup>a</sup> | 0.37±0.02 <sup>a</sup>  |
| Histidine (His)     | 0.16±0.01 <sup>a</sup>  | 0.17±0.08 <sup>a</sup>  | 0.19±0.03 <sup>a</sup> | 0.14±0.01 <sup>a</sup> | 0.18±0.00 <sup>a</sup>  | 0.20±0.01 <sup>a</sup> | 0.16±0.02 <sup>a</sup>  |
| Lysine (Lys)        | 0.34±0.00 <sup>a</sup>  | 0.35±0.15 <sup>a</sup>  | 0.45±0.05 <sup>a</sup> | 0.35±0.03 <sup>a</sup> | 0.38±0.00 <sup>a</sup>  | 0.42±0.02 <sup>a</sup> | 0.37±0.03 <sup>a</sup>  |
| Arginine (Arg)      | 0.91±0.16 <sup>a</sup>  | 0.93±0.36 <sup>a</sup>  | 0.92±0.08 <sup>a</sup> | 0.68±0.04 <sup>b</sup> | 0.91±0.01 <sup>a</sup>  | 0.11±0.07 <sup>c</sup> | 0.91±0.11 <sup>a</sup>  |
| Proline (Pro)       | 0.23±0.01 <sup>b</sup>  | 0.30±0.14 <sup>a</sup>  | 0.32±0.02 <sup>a</sup> | 0.22±0.04 <sup>b</sup> | 0.36±0.02 <sup>a</sup>  | 0.31±0.00 <sup>a</sup> | 0.25±0.02 <sup>b</sup>  |

Data are given as means ± standard deviation (n=3). Values with the same letter in the same row are not significantly different ( $p < 0.05$ ). Data are presented as mg/g dry kernel weight.

**Supplementary Table S2.** Maltese cross differences and Raman spectra ratios of ginkgo starches from seven cultivars

| Samples | Regular<br>Maltese<br>crosses (%) | Irregular<br>Maltese<br>crosses (%) | 480/942<br>cm <sup>-1</sup> | 865/942 cm <sup>-1</sup> |                        |                        | 952/942<br>cm <sup>-1</sup> |
|---------|-----------------------------------|-------------------------------------|-----------------------------|--------------------------|------------------------|------------------------|-----------------------------|
|         |                                   |                                     |                             | Periphery<br>of starch   | Centre of<br>starch    | Whole<br>starch        |                             |
| QXG     | 41.28±1.8 <sup>cd</sup>           | 58.72±1.81 <sup>a</sup>             | 1.89±0.01 <sup>b</sup>      | 0.69±0.05 <sup>cd</sup>  | 0.41±0.05 <sup>b</sup> | 0.54±0.04 <sup>b</sup> | 0.22±0.01 <sup>a</sup>      |
| DFZ     | 58.93±2.93 <sup>a</sup>           | 41.07±2.93 <sup>c</sup>             | 2.03±0.02 <sup>a</sup>      | 0.87±0.06 <sup>b</sup>   | 0.40±0.02 <sup>b</sup> | 0.65±0.10 <sup>a</sup> | 0.11±0.00 <sup>b</sup>      |
| DTH     | 54.07±1.82 <sup>ab</sup>          | 45.93±1.82 <sup>bc</sup>            | 2.09±0.02 <sup>a</sup>      | 0.77±0.10 <sup>c</sup>   | 0.33±0.02 <sup>c</sup> | 0.48±0.01 <sup>c</sup> | 0.21±0.01 <sup>a</sup>      |
| FZ      | 43.91±3.05 <sup>c</sup>           | 56.09±3.05 <sup>a</sup>             | 2.01±0.01 <sup>a</sup>      | 0.61±0.02 <sup>d</sup>   | 0.33±0.03 <sup>c</sup> | 0.44±0.03 <sup>c</sup> | 0.10±0.01 <sup>b</sup>      |
| ML      | 51.79±5.96 <sup>ab</sup>          | 48.21±5.96 <sup>bc</sup>            | 2.00±0.03 <sup>a</sup>      | 0.96±0.07 <sup>a</sup>   | 0.53±0.03 <sup>a</sup> | 0.69±0.03 <sup>a</sup> | 0.11±0.01 <sup>b</sup>      |
| DLY     | 54.28±0.62 <sup>ab</sup>          | 45.72±0.62 <sup>bc</sup>            | 1.89±0.04 <sup>b</sup>      | 0.86±0.11 <sup>b</sup>   | 0.42±0.01 <sup>b</sup> | 0.59±0.01 <sup>b</sup> | 0.11±0.01 <sup>b</sup>      |
| LY      | 48.54±4.21 <sup>b</sup>           | 51.46±4.21 <sup>ab</sup>            | 2.02±0.09 <sup>a</sup>      | 0.74±0.04 <sup>c</sup>   | 0.40±0.02 <sup>b</sup> | 0.53±0.07 <sup>b</sup> | 0.21±0.01 <sup>a</sup>      |

Data are given as means ± standard deviation (n = 3). Values with the same letter in a column of the same cultivar are not significantly different ( $p < 0.05$ ).

**Supplementary Table S3.** Pearson correlation coefficients for basic compositions, starch structure parameters, thermal properties, and pasting properties of kernel powders from seven ginkgo cultivars.

| Items            | TSC   | AAC    | CPC    | TAAC  | 480/942 | 865/942 | 952/942 |
|------------------|-------|--------|--------|-------|---------|---------|---------|
| $T_o$            | -0.22 | -0.62  | -0.42  | -0.33 | 0.20    | -0.39   | 0.28    |
| $T_p$            | -0.14 | -0.16  | 0.28   | 0.05  | -0.26   | 0.39    | -0.35   |
| $T_c$            | -0.03 | -0.03  | 0.63   | 0.15  | -0.55   | 0.16    | -0.12   |
| $\Delta H_{gel}$ | -0.11 | -0.61  | -0.70* | -0.43 | 0.28    | -0.72*  | 0.65*   |
| $T_o'$           | 0.04  | -0.52  | -0.61  | 0.39  | 0.32    | -0.71*  | 0.80*   |
| $T_p'$           | 0.87* | 0.82*  | -0.06  | -0.32 | 0.50    | 0.43    | -0.13   |
| $T_c'$           | 0.21  | 0.72*  | 0.29   | 0.21  | -0.15   | 0.78*   | -0.75*  |
| $\Delta H_{ret}$ | 0.16  | 0.37   | 0.27   | -0.18 | -0.56   | 0.17    | -0.45   |
| PV               | -0.47 | -0.56  | -0.46  | -0.06 | 0.70*   | -0.58   | 0.16    |
| HV               | -0.44 | -0.45  | -0.38  | 0.03  | 0.75*   | -0.48   | 0.10    |
| BV               | -0.49 | -0.77* | -0.59  | -0.27 | 0.47    | -0.77*  | 0.31    |
| FV               | -0.43 | -0.45  | -0.53  | -0.11 | 0.72*   | -0.58   | 0.08    |
| SV               | -0.23 | -0.05  | -0.41  | -0.07 | 0.76*   | -0.37   | -0.14   |
| PT               | -0.59 | -0.28  | 0.34   | 0.37  | 0.37    | 0.00    | -0.48   |
| $P_{Temp}$       | -0.47 | -0.12  | -0.44  | -0.19 | 0.36    | -0.19   | -0.66*  |

\* and \*\* indicated the significance at  $P < 0.05$  and  $P < 0.01$  level, respectively ( $n = 7$ ). TSC, AAC, CPC, and TAAC are the total starch content, apparent amylose content, crude protein content, and total amino acid of ginkgo kernel flours, respectively.  $T_o$ ,  $T_p$ ,  $T_c$ , and  $\Delta H_{gel}$  correspond to the onset temperature, peak temperature, conclusion temperature, and enthalpy of gelatinization of native flours, respectively.  $T_o'$ ,  $T_p'$ ,  $T_c'$ , and  $\Delta H_{ret}$  are the onset temperature, peak temperature, conclusion temperature, and enthalpy of gelatinization of retrogradation, respectively. PV, HV, BV, FV, SV, PT, and  $P_{Temp}$  are the peak viscosity, hot viscosity, breakdown viscosity (PV-HV), final viscosity, setback viscosity (FV-HV), peak time, and pasting temperature, respectively.

**Supplementary Table S4.** Pasting properties of kernel powders from seven ginkgo cultivars treated with water, DDT, and AgNO<sub>3</sub>

| Samples                            | PV(cP)                     | HV(cP)                      | BV (cP)                    | FV (cP)                    | SV (cP)                     | PT (min)                | P <sub>Temp</sub> (°C)   |
|------------------------------------|----------------------------|-----------------------------|----------------------------|----------------------------|-----------------------------|-------------------------|--------------------------|
| <i>Powders in Water</i>            |                            |                             |                            |                            |                             |                         |                          |
| QXG                                | 634.50±19.10 <sup>f</sup>  | 327.50±13.40 <sup>g</sup>   | 300.00±15.60 <sup>d</sup>  | 427.00±22.60 <sup>f</sup>  | -192.30±15.60 <sup>g</sup>  | 4.70±0.10 <sup>b</sup>  | 82.10±0.20 <sup>c</sup>  |
| DFZ                                | 1162.00±19.80 <sup>d</sup> | 810.50±17.70 <sup>d</sup>   | 340.50±17.70 <sup>c</sup>  | 1021.00±14.10 <sup>c</sup> | -48.00±20.50 <sup>d</sup>   | 5.10±0.10 <sup>a</sup>  | 82.90±0.10 <sup>b</sup>  |
| DTH                                | 1946.50±16.30 <sup>a</sup> | 1446.00±17.00 <sup>a</sup>  | 489.50±14.80 <sup>b</sup>  | 2121.00±17.00 <sup>a</sup> | 204.70±18.40 <sup>a</sup>   | 5.00±0.10 <sup>ab</sup> | 82.80±0.10 <sup>b</sup>  |
| FZ                                 | 1818.50±20.50 <sup>b</sup> | 1255.50±12.00 <sup>b</sup>  | 555.00±19.80 <sup>a</sup>  | 2112.00±15.60 <sup>a</sup> | 188.70±15.60 <sup>b</sup>   | 5.00±0.10 <sup>ab</sup> | 83.80±0.10 <sup>a</sup>  |
| ML                                 | 532.00±19.80 <sup>g</sup>  | 416.50±13.40 <sup>f</sup>   | 110.00±14.10 <sup>e</sup>  | 541.00±18.40 <sup>e</sup>  | -40.30±4.90 <sup>c</sup>    | 4.80±0.10 <sup>b</sup>  | 82.90±0.10 <sup>b</sup>  |
| DLY                                | 972.50±13.40 <sup>e</sup>  | 673.50±16.30 <sup>e</sup>   | 286.50±14.80 <sup>d</sup>  | 836.50±21.90 <sup>d</sup>  | -114.30±19.10 <sup>f</sup>  | 5.00±0.10 <sup>ab</sup> | 83.10±0.10 <sup>b</sup>  |
| LY                                 | 1657.50±13.40 <sup>c</sup> | 1064.50±17.70 <sup>c</sup>  | 581.50±12.00 <sup>a</sup>  | 1598.50±17.70 <sup>b</sup> | -71.50±21.90 <sup>e</sup>   | 4.80±0.20 <sup>b</sup>  | 83.00±0.00 <sup>b</sup>  |
| <i>Powders in AgNO<sub>3</sub></i> |                            |                             |                            |                            |                             |                         |                          |
| QXG                                | 3457.00±17.00 <sup>b</sup> | 1683.00±15.60 <sup>bc</sup> | 1763.50±16.30 <sup>b</sup> | 2434.00±18.40 <sup>d</sup> | -1011.50±14.80 <sup>e</sup> | 4.50±0.30 <sup>a</sup>  | 79.40±0.40 <sup>ab</sup> |
| DFZ                                | 2739.00±18.40 <sup>f</sup> | 1455.00±18.40 <sup>e</sup>  | 1274.50±13.40 <sup>f</sup> | 2142.00±14.10 <sup>e</sup> | -589.00±15.60 <sup>c</sup>  | 4.70±0.20 <sup>a</sup>  | 79.20±0.80 <sup>ab</sup> |
| DTH                                | 3233.50±17.70 <sup>d</sup> | 1772.00±12.70 <sup>a</sup>  | 1454.00±15.60 <sup>d</sup> | 2631.00±15.60 <sup>a</sup> | -593.00±15.60 <sup>c</sup>  | 4.50±0.30 <sup>a</sup>  | 78.60±0.50 <sup>b</sup>  |
| FZ                                 | 3328.50±17.70 <sup>c</sup> | 1662.50±14.80 <sup>c</sup>  | 1656.50±16.30 <sup>c</sup> | 2543.00±15.60 <sup>b</sup> | -769.50±24.70 <sup>d</sup>  | 4.40±0.10 <sup>a</sup>  | 79.40±0.30 <sup>ab</sup> |
| ML                                 | 2369.50±17.10 <sup>g</sup> | 1375.50±17.70 <sup>f</sup>  | 984.50±13.40 <sup>g</sup>  | 2021.00±17.00 <sup>f</sup> | -333.50±21.90 <sup>a</sup>  | 4.60±0.20 <sup>a</sup>  | 80.10±0.40 <sup>a</sup>  |
| DLY                                | 2936.50±17.70 <sup>e</sup> | 1524.00±15.60 <sup>d</sup>  | 1403.00±15.60 <sup>e</sup> | 2496.00±12.70 <sup>c</sup> | -431.00±18.40 <sup>b</sup>  | 4.60±0.20 <sup>a</sup>  | 79.40±0.30 <sup>ab</sup> |
| LY                                 | 3591.00±12.70 <sup>a</sup> | 1712.00±14.10 <sup>b</sup>  | 1866.00±17.00 <sup>a</sup> | 2562.50±16.30 <sup>b</sup> | -1014.50±16.30 <sup>e</sup> | 4.40±0.20 <sup>a</sup>  | 78.80±0.40 <sup>b</sup>  |
| <i>Powders in DTT</i>              |                            |                             |                            |                            |                             |                         |                          |
| QXG                                | 1694.00±15.60 <sup>d</sup> | 996.50±21.90 <sup>e</sup>   | 683.50±13.40 <sup>a</sup>  | 2301.50±14.80 <sup>f</sup> | 595.50±11.50 <sup>c</sup>   | 5.20±0.00 <sup>d</sup>  | 83.80±0.20 <sup>c</sup>  |
| DFZ                                | 1845.00±18.40 <sup>c</sup> | 1353.50±16.30 <sup>c</sup>  | 484.00±12.70 <sup>b</sup>  | 3157.50±16.30 <sup>a</sup> | 1301.00±10.00 <sup>a</sup>  | 5.40±0.00 <sup>bc</sup> | 83.60±0.20 <sup>c</sup>  |
| DTH                                | 2323.00±18.40 <sup>a</sup> | 2151.50±12.00 <sup>a</sup>  | 165.00±15.60 <sup>g</sup>  | 2430.50±13.40 <sup>d</sup> | 96.00±8.00 <sup>f</sup>     | 7.00±0.00 <sup>a</sup>  | 84.50±0.20 <sup>b</sup>  |
| FZ                                 | 2219.00±17.00 <sup>b</sup> | 2001.00±17.00 <sup>b</sup>  | 207.00±15.60 <sup>f</sup>  | 2364.50±12.00 <sup>e</sup> | 132.00±10.00 <sup>e</sup>   | 6.90±0.10 <sup>a</sup>  | 85.30±0.20 <sup>a</sup>  |
| ML                                 | 895.00±11.30 <sup>e</sup>  | 542.50±21.90 <sup>f</sup>   | 333.00±17.00 <sup>d</sup>  | 704.00±17.00 <sup>g</sup>  | -195.00±8.00 <sup>g</sup>   | 4.80±0.00 <sup>cd</sup> | 83.80±0.20 <sup>c</sup>  |
| DLY                                | 1722.00±15.60 <sup>d</sup> | 1298.00±17.00 <sup>d</sup>  | 415.00±11.30 <sup>c</sup>  | 2892.00±15.60 <sup>b</sup> | 1161.50±8.50 <sup>b</sup>   | 5.60±0.00 <sup>b</sup>  | 83.60±0.20 <sup>c</sup>  |
| LY                                 | 2297.00±14.10 <sup>a</sup> | 2023.50±17.70 <sup>b</sup>  | 263.50±10.60 <sup>e</sup>  | 2843.00±17.00 <sup>c</sup> | 534.50±13.50 <sup>d</sup>   | 6.50±0.00 <sup>a</sup>  | 83.70±0.20 <sup>c</sup>  |

Data are given as means ± standard deviation (n = 3). Values in the same column with different letters were significantly different (P < 0.05). PV, HV, BV, FV, SV, PT, and P<sub>Temp</sub> are described in the footnotes of Table S3.
